# Supplementary material for: Mesostructure-tunable and size-controllable hierarchical porous silica nanospheres synthesized by aldehyde-modified Stöber method
Source: Royal Society of Chemistry journal article supplement (doi:10.1039/c5ra09456a), 2015-01-01
Supplement: c5ra09456a1.pdf [file c5ra09456a1.pdf]

## Mesostructure-tunable and size-controllable hierarchical porous silica nanospheres synthesized by aldehyde-modified Stöber method

Received 00th January 20xx,  
Accepted 00th January 20xx

DOI: 10.1039/x0xx00000x

Anfeng Zhang<sup>a</sup>, Lin Gu<sup>b</sup>, Keke Hou<sup>c</sup>, Chengyi Dai<sup>a</sup>, Chunshan Song<sup>a,d\*</sup> and Xinwen Guo<sup>a\*</sup>

www.rsc.org/

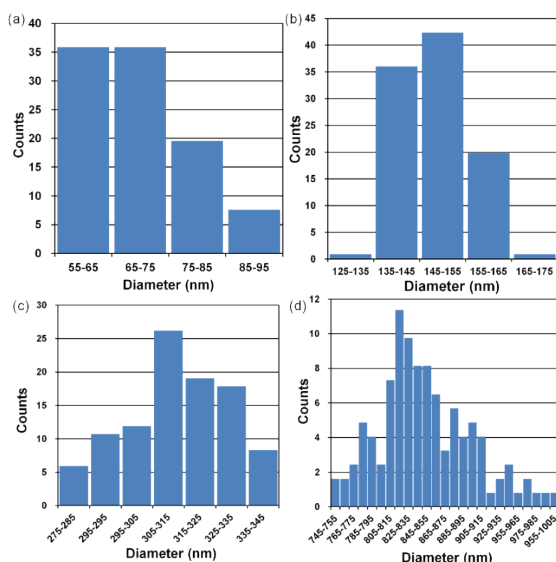

Figure S1. Particle size distributions of MMSNs synthesized with different A/M : S-1-A R=0.11 (a), S-2-A R=0.13 (b), S-3-A R=0.17 (c) and S-4-A R=0.22 (d).

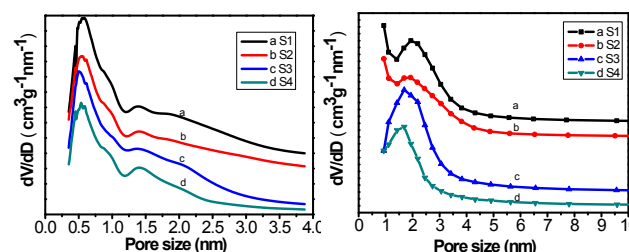

Figure S2. Pore size distributions of MMSNs synthesized with different A/M : S-1-A R=0.11 (a), S-2-A R=0.13 (b), S-3-A R=0.17 (c) and S-4-A R=0.22 (d)

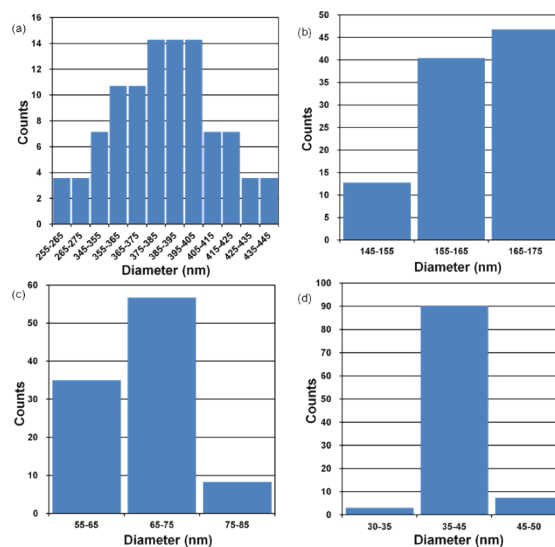

Figure S3. Particle size distributions of MMSNs synthesized at different initial pH values using the same A/W R=0.17: S-5-A pH 7.6 (a), S-6-A pH 8.5 (b), S-7-A pH 9.4 (c) and S-8-A pH 10.4 (d)

<sup>a</sup> State Key Lab of Fine Chemicals, PSU-DUT Joint Center for Energy Research, School of Chemical Engineering, Dalian University of Technology, Dalian 116024, P R. China. Fax: 86-0411-86986134; Tel: 86-0411-86986133; E-mail: Guoxw@dlut.edu.cn

<sup>b</sup> Shanghai Baosteel Chemical Co., Ltd. No.3501 Tongji Road, Shanghai, P R. China.

<sup>c</sup> Chambroad Chemical Industry Research Institute Co.,LTD, Binzhou, Shandong, P R. China.

<sup>d</sup> EMS Energy Institute, PSU-DUT Joint Center for Energy Research, Department of Energy & Mineral Engineering, and Department of Chemical Engineering Pennsylvania State University, University Park, Pennsylvania 16802, United States. Fax: 814-865-3573; Tel: 814-863-4466; E-mail: csong@psu.edu

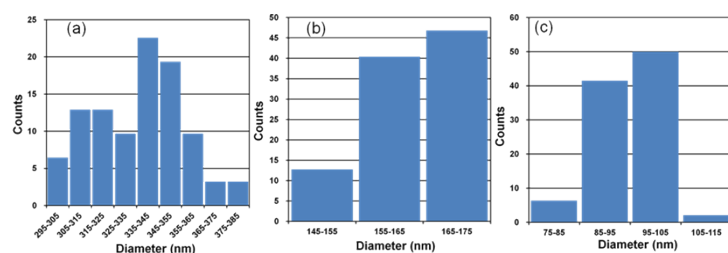

Figure S4. Particle size distributions of MMSNs synthesized with different A/M at the pH=8.5: S-9-A R=0.22 (a), S-6-A R=0.17 (b) and S-10-A R=0.11 (c)

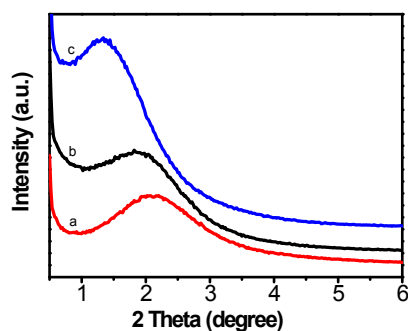

Figure S5. Powder XRD patterns for HMSNs synthesized with different aldehydes: S-4-A (a), S-11-P (b) and S-12-B (c)

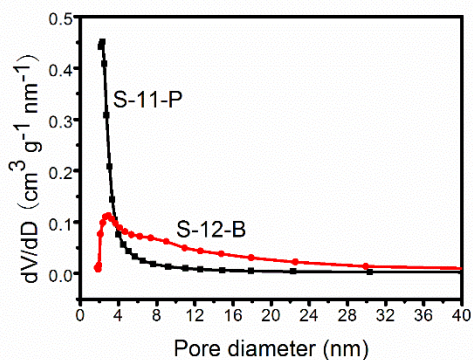

Figure S6 The pore size distributions of S-11-P and S-12-B.

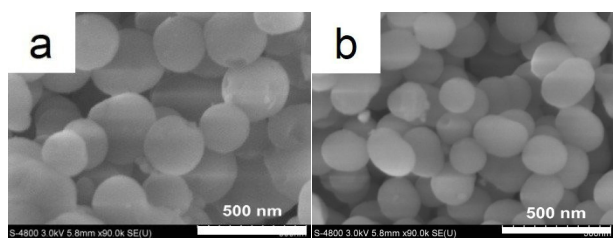

Figure S7. SEM images of MMSNs synthesized at different temperatures: S-13- A 85 °C and S-14- Acetaldehyde 100 °C.

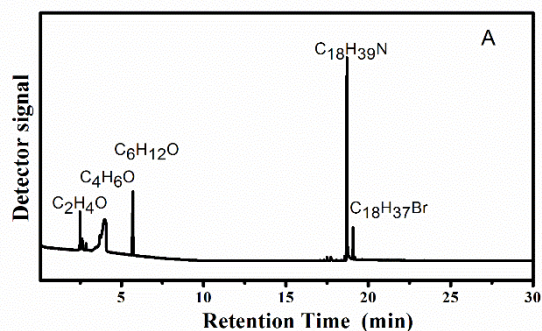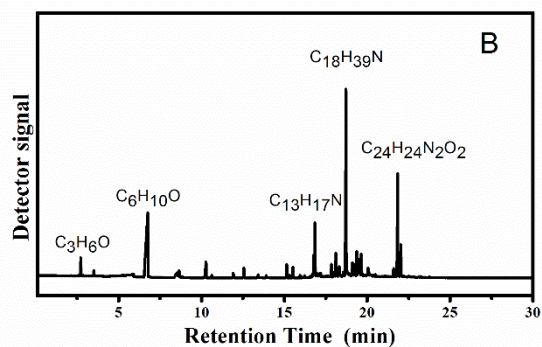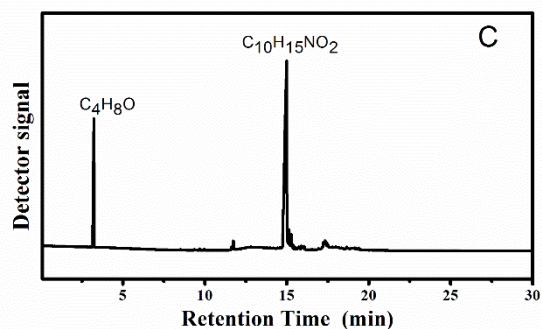

Figure S8. GC-MS spectra of the product of different aldehyde reacted at 27 °C: (a) Acetaldehyde system, (b) Propionaldehyde system and (c) Oil phase of butyraldehyde system.

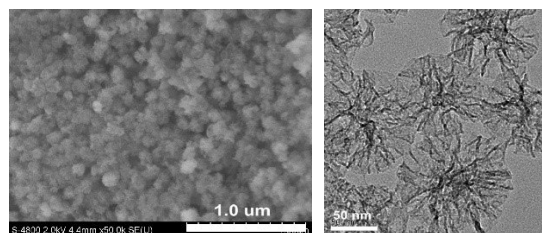

Figure S9. SEM and TEM image of MMSNs synthesized with amyl aldehyde as co-solvent at 27 °C
